# Supplementary material for: Distinct and sex-specific expression of mu opioid receptors in anterior cingulate and somatosensory S1 cortical areas
Source: PubMed Central journal article supplement — Pain. 2022 Aug 16;164(4):703–16. doi: 10.1097/j.pain.0000000000002751 (PMC10026835; doi:10.1097/j.pain.0000000000002751), 2022-08-16
Supplement: jop-164-0703-s001.pdf [file jop-164-0703-s001.pdf]

## Supplemental Information

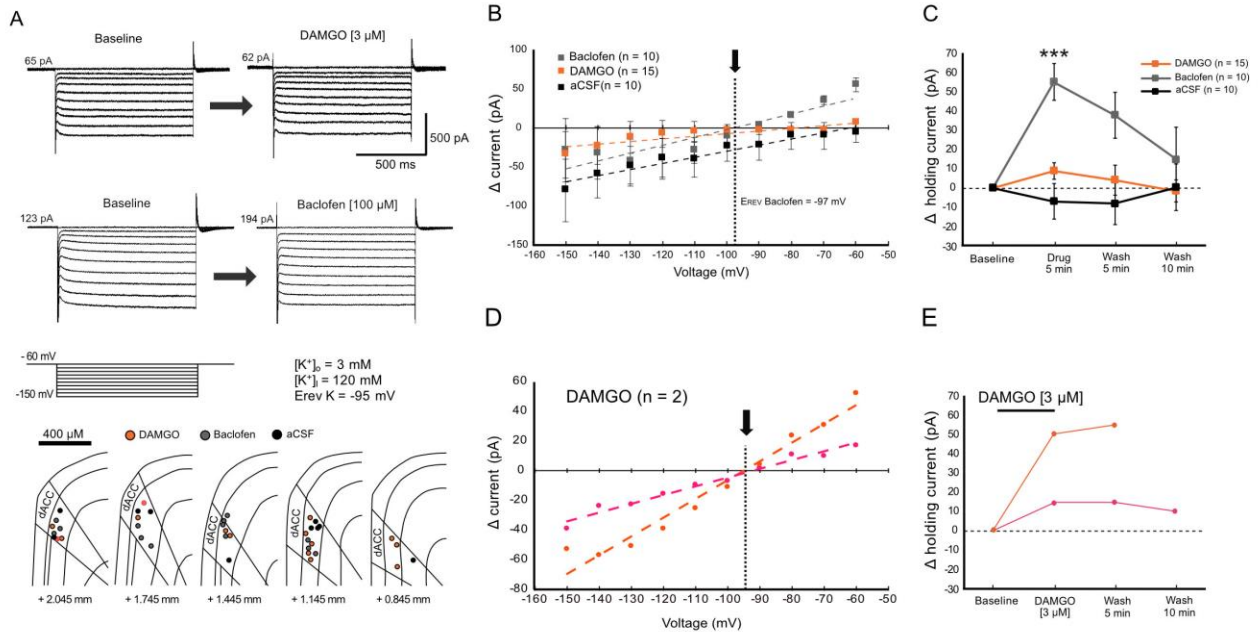

**Supplemental Figure 1 - DAMGO induces hyperpolarizing potassium currents in a subpopulation of neurons in ACC in wildtype mice.** A) Voltage clamp traces from -150 mV to -60 mV square pulses in 10 mV increments. Neuron recorded at baseline and after 5 minutes of DAMGO application (top traces). Current needed to keep neuron at  $V_h = -60$  mV is indicated. Neuron recorded at baseline and after baclofen (bottom traces). Lower panel shows location of recorded neurons, and all neurons displayed pyramidal-like firing patterns. B) Differential ( $\Delta$ ) current (drug minus baseline). C) Quantification of holding currents following baclofen ( $55.3 \pm 9.6$  pA), DAMGO ( $8.8 \pm 4.3$  pA), and aCSF ( $-7.0 \pm 9.3$  pA). Two-way mixed ANOVA  $F(2,35) = 17.04$ ,  $p < 0.0001$ . Tukey's multiple comparisons tests. Baclofen group was significantly greater than DAMGO and aCSF, which did not significantly differ from each other. For B) & C) Baclofen group (n = 10 cells, 4 mice), DAMGO (n = 15 cells, 4 mice), aCSF group (n = 10 cells, 4 mice). All recordings were performed in male mice. D) Neurons (2/15) in the DAMGO group have delta currents with reversal near -95 mV, suggesting that these excitatory neurons express MOR. E) Holding currents for DAMGO-sensitive neurons. Data are presented as mean  $\pm$  SEM in B, C. \*\*\*  $p < 0.001$ .

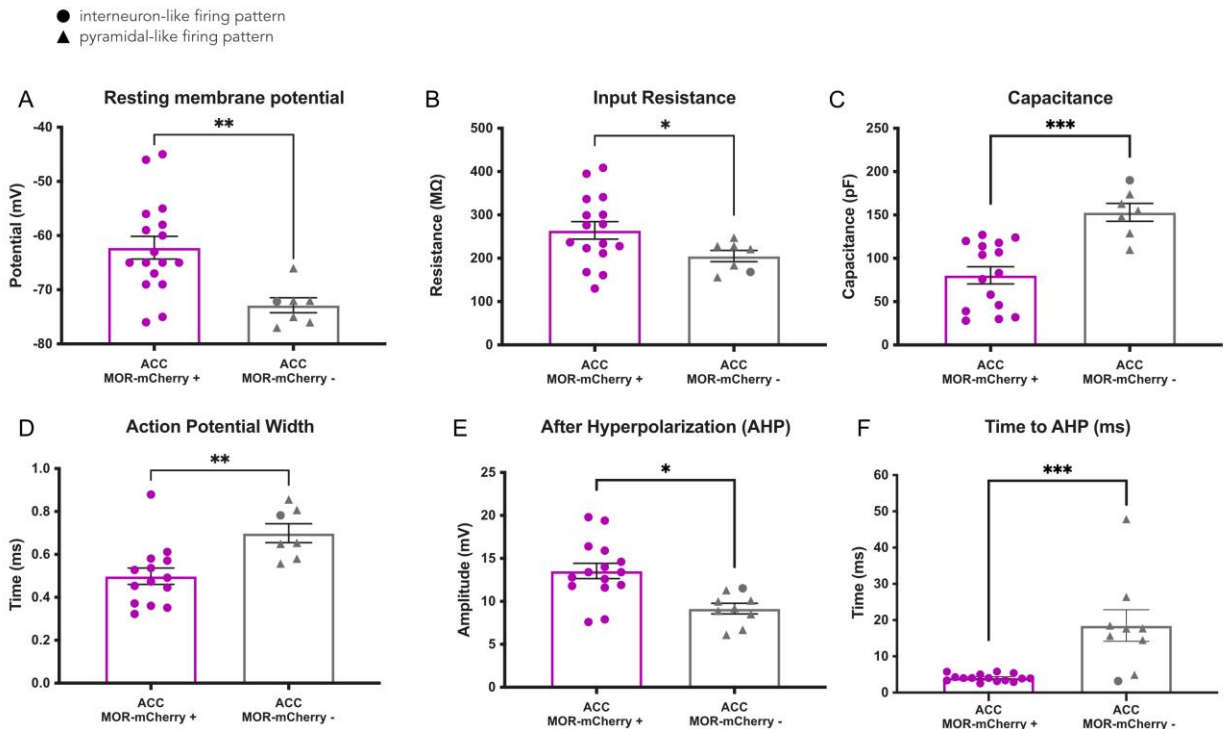

**Supplemental Figure 2 - Electrophysiological differences between MOR-mCherry+ and MOR-mCherry-negative neurons.** Interneuron-like firing patterns are represented with circles and pyramidal-like firing patterns are represented with triangles. A) MOR-mCherry+ neurons had higher resting membrane potential (RMP) (mean = -62.24mV) compared to the MOR-mCherry-negative group (mean = -72.86 mV),  $t(22) = 3.120$ ,  $p < 0.01$ . B) Input resistance ( $R_{in}$ ) was significantly high in MOR-mCherry+ neurons (mean = 264.2 MΩ) compared to MOR-mCherry-negative neurons (mean = 205.1 MΩ),  $t(21) = 1.850$ ,  $p < 0.05$ . (one tailed t-test performed). C) MORmCherry+ group had a significantly lower capacitance (mean = 80.40 pF) compared to MOR-mCherry-negative group (mean = 153 pF),  $t(20) = 4.484$ ,  $p < 0.001$ . D) Action potential width was significantly narrower in MOR-mCherry+ neurons (mean = 0.50 ms) compared to MOR-mCherry-negative (mean = 0.70 ms)  $t(20) = 3.203$ ,  $p < 0.01$ . E) AHP amplitude was significantly higher in MOR-mCherry+ neurons (mean = 13.54 mV) compared to MOR-mCherry-negative neurons (mean = 9.156 mV)  $t(22)=3.$ ,  $p < 0.01$ . F) Time to AHP, was significantly shorter in MOR-mCherry+ neurons (mean = 4.10 ms) compared to MOR-mCherry-negative neurons (mean = 18.49 ms),  $t(22) =$ ,  $p < 0.001$ . ACC MOR-mCherry+ group (n= 17 cells, 9 mice), ACC MOR-mCherry-ve group (n= 7 cells, 4 mice). All recordings were performed in male mice. Two-tailed student t-test were performed except where mentioned otherwise. Data are presented as mean  $\pm$  SEM with dots showing individual neurons, \*  $p < 0.05$ , \*\*  $p < 0.01$ , \*\*\*  $p < 0.001$ .

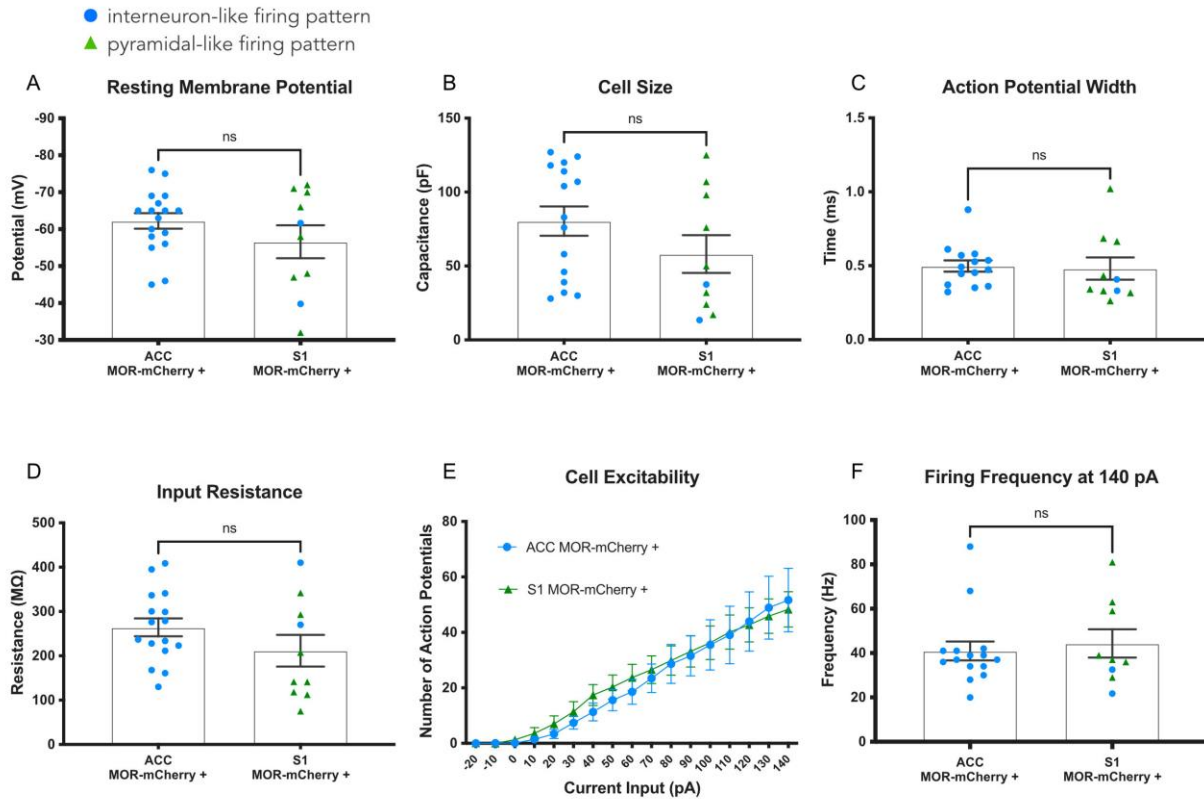

**Supplemental Figure 3 – Electrophysiological properties of MOR-mCherry+ neurons in ACC and S1.** A) Resting membrane potential,  $t(25) = 1.297$ ,  $p = 0.2066$ . B) Cell size  $t(23) = 1.396$ ,  $p = 0.1761$ . C) Action potential width,  $t(22) = 0.2257$ ,  $p = 0.8235$ . D) Input resistance  $t(24) = 1.387$ ,  $p = 0.1781$ . E) Cell excitability - the number of action potentials induced by increasing current steps from -20 pA to +140 pA, two-way mixed ANOVA  $F(16,391) = 0.08002$ ,  $p > 0.999$ . F) Firing frequency at 140 pA  $t(22) = 0.4602$ ,  $p = 0.6499$ . ACC MOR-mCherry+ group ( $n = 17$  cells, 9 mice), S1 MOR-mCherry-ve group ( $n = 10$  cells, 7 mice). All recordings were performed in male mice. Data are presented as mean  $\pm$  SEM with dots showing individual neurons. Interneuron-like firing pattern (blue circles) and pyramidal-like firing pattern (green triangles).

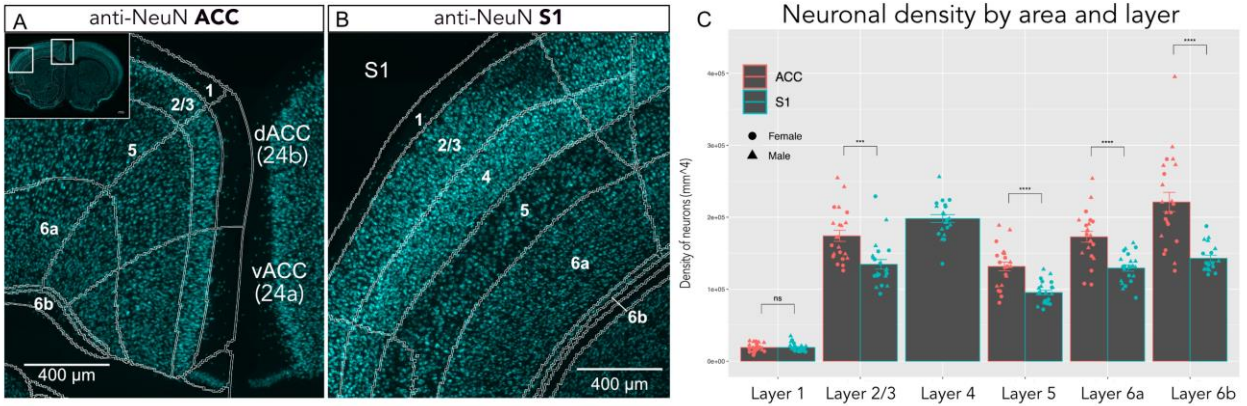

**Supplemental Figure 4 – Neuronal density by cortical area and layer.** A) Sample images of NeuN staining in ACC (left) and S1 (right), atlas is overlaid in white. B) Quantification of NeuN staining. Two-way mixed ANOVA  $F(1.68,30.33) = 26.01$ ,  $p < 0.0001$ . Wilcoxon signed-rank test. For both the ACC and S1 data, we analyzed the male group ( $n= 12$  sections, 3 mice) and the female group ( $n= 10$  sections, 3 mice). Data are presented as mean  $\pm$  SEM with dots showing individual data points. \*\*\*  $p < 0.001$ , \*\*\*\*  $p < 0.0001$ .

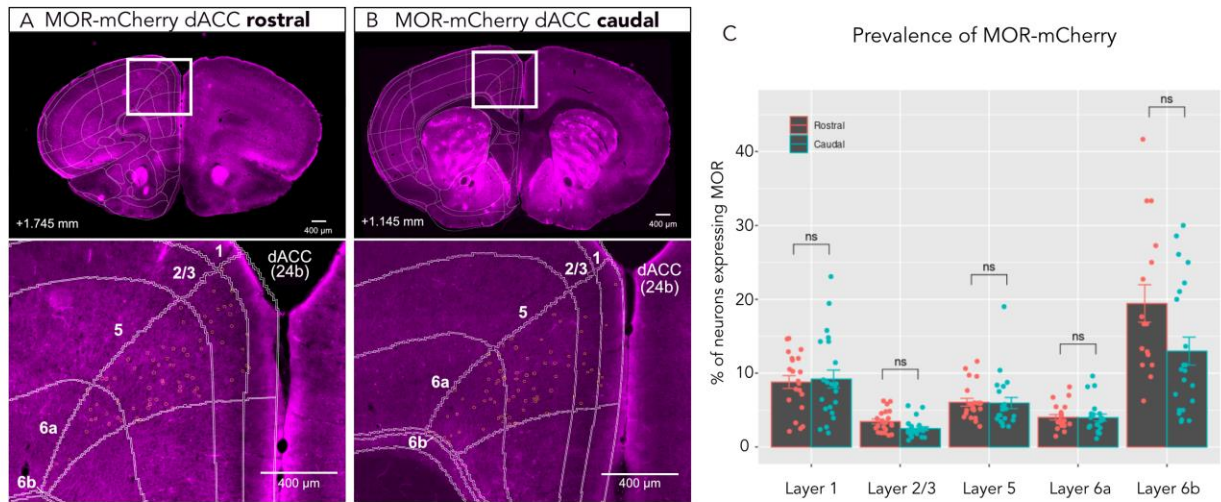

**Supplemental Figure 5 – Comparison of MOR expression on a rostro-caudal axis of dorsal ACC (area 24b).** A) Typical whole brain images of rostral (top, bregma +1.745 mm to +1.445 mm) and caudal section (bottom, bregma +1.145 mm to -0.055 mm) of MOR-mCherry mice. B) Magnification of dACC in rostral (left) and caudal section (right). Atlas is overlaid in white, and MOR-mCherry+ neurons are outlined in yellow. C) Quantification of MOR-mCherry expression in dACC. Two-way mixed ANOVA  $F(1.43, 21.47) = 3.08$ ,  $p = 0.081$ . Wilcoxon signed-rank test. Rostral sections – pooled male group ( $n = 12$  sections, 3 mice) and female group ( $n = 11$  sections, 3 mice). Caudal sections – pooled male group ( $n = 12$  sections, 3 mice) and female group ( $n = 10$  sections, 3 mice). Data are presented as mean  $\pm$  SEM with dots showing individual data points.

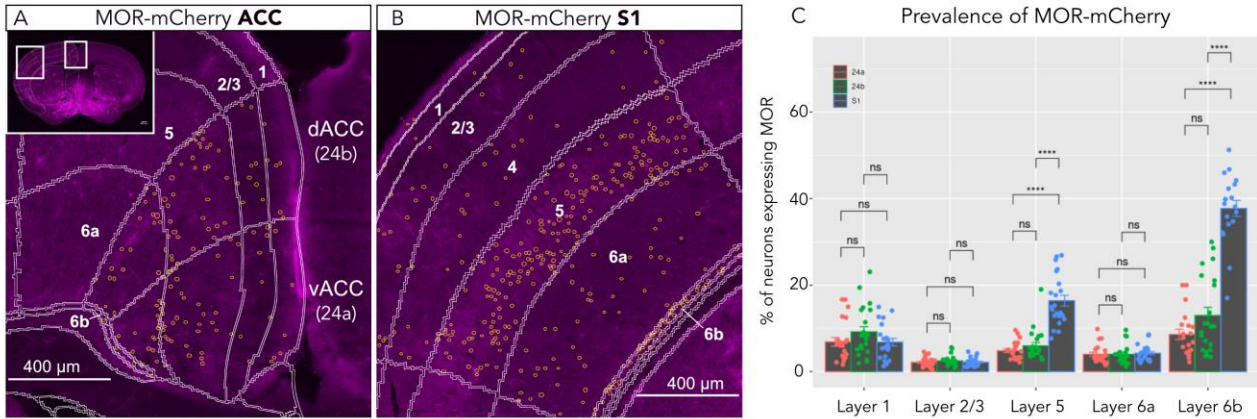

**Supplemental Figure 6 – Comparison of MOR expression between dACC, vACC and S1.** A-B) Representative whole mouse brain section with MOR-mCherry staining (top corner). Magnification of dACC and vACC (left) and S1 (right). Atlas is overlaid in white and MOR-mCherry+ neurons outlined in yellow circles. C) Quantification of MOR-mCherry expression by region and layer. Two-way mixed ANOVA  $F(3.54, 56.62) = 72.19$ ,  $p < 0.0001$ . Wilcoxon signed-rank test. For dACC (24b), vACC (24a), and S1 the entire area was analyzed in pooled male group ( $n = 12$  sections, 3 mice) and female group ( $n = 10$  sections, 3 mice). Data are presented as mean  $\pm$  SEM with dots showing individual data points. \*\*\*\*  $p < 0.0001$ .

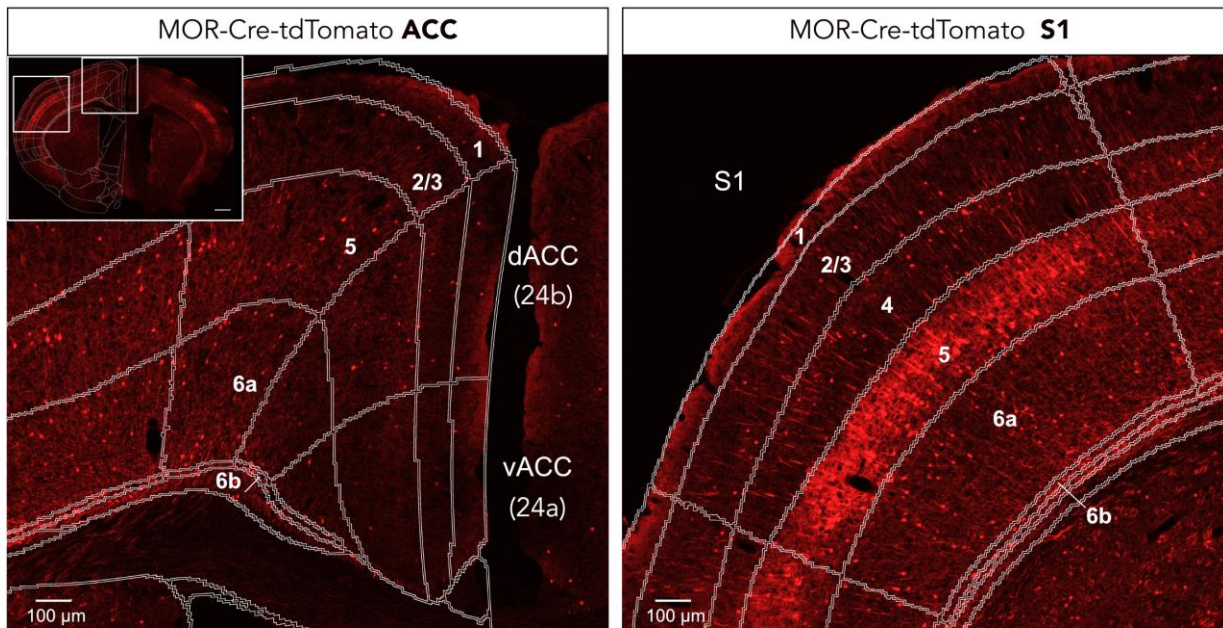

**Supplemental Figure 7 - Qualitative cross-validation of MOR expression with the *Oprm1*<sup>Cre</sup> – tdTomato reporter line.** MOR-expressing tdTomato+ neurons visualized at the whole brain level (top corner), in ACC (left) and S1(right). Similar experiments were performed on a male group (n= 3) and female group (n= 4), data not shown.
